# Supplementary material for: Protection following BNT162b2 booster in adolescents substantially exceeds that of a fresh 2-dose vaccine
Source: Springer Nature journal article supplement (doi:10.1038/s41467-022-29578-w), 2022-04-13

# Protection following BNT162b2 booster in adolescents substantially exceeds that of a fresh 2-dose vaccine

Ofra Amir<sup>†1</sup>, Yair Goldberg<sup>†1\*</sup>, Micha Mandel<sup>2</sup>, Yinon M. Bar-On<sup>3</sup>, Omri Bodenheimer<sup>4</sup>, Nachman Ash<sup>4</sup>, Sharon Alroy-Preis<sup>4</sup>, Amit Huppert<sup>†5,6</sup>, Ron Milo<sup>†3</sup>

<sup>1</sup> Technion - Israel Institute of Technology, Israel

<sup>2</sup> The Hebrew University of Jerusalem, Israel

<sup>3</sup>Department of Plant and Environmental Sciences, Weizmann Institute of Science, Israel

<sup>4</sup> Israel Ministry of Health, Israel

<sup>5</sup> The Bio-statistical and Bio-mathematical Unit, The Gertner Institute for Epidemiology & Health Policy Research, Sheba Medical Center, Israel

<sup>6</sup> The Sackler Faculty of Medicine, Tel Aviv University, Israel

<sup>†</sup>These authors contributed equally

\*corresponding author

email: yairgo@technion.ac.il

# Supplementary Information

## Contents

|                                                               |   |
|---------------------------------------------------------------|---|
| Figure S1 - Study population                                  | 3 |
| Figure S2 - Confirmed infection rates in different age groups | 4 |
| Figure S3 - Protection compared to unvaccinated individuals   | 5 |
| Figure S4 - PCR testing rates in different age groups         | 6 |

## Figure S1 - Study population

*The study population included persons who were between the ages of 12-14 or 16-18, had no documented positive PCR result prior to the study period, had not stayed abroad during the whole study period, and had not been vaccinated with a vaccine different from BNT162b2 before the beginning of the study period.*

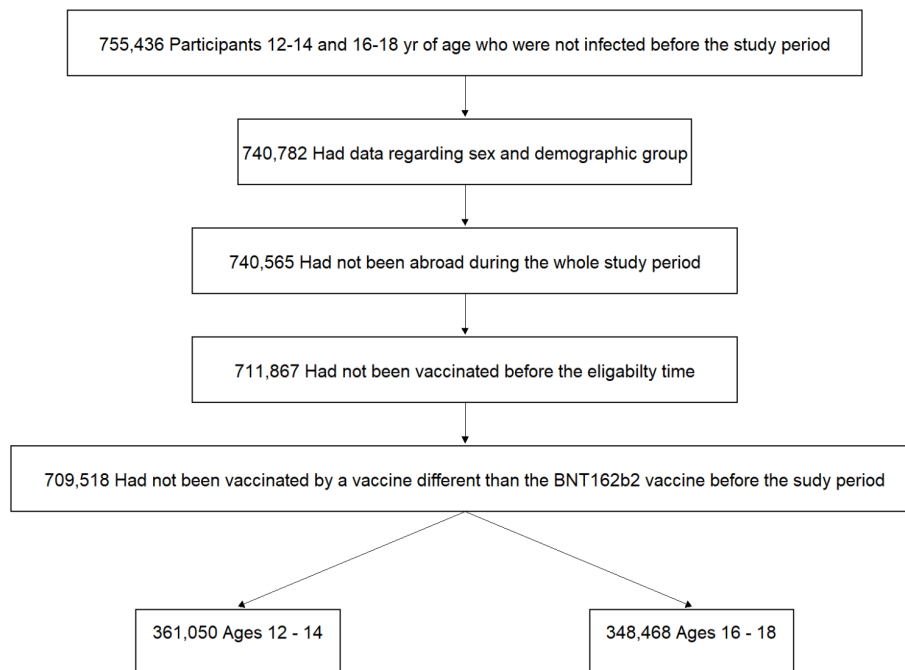

## Figure S2 - Confirmed infection rates in different age groups

Crude infection rates per 100,000 at-risk days during the study period between September 12, 2021 to October 9, 2021, stratified by cohort and age. The 15-year-old age group is not shown since it includes individuals who were eligible to vaccinate at different times. Error bars show 95% confidence intervals.

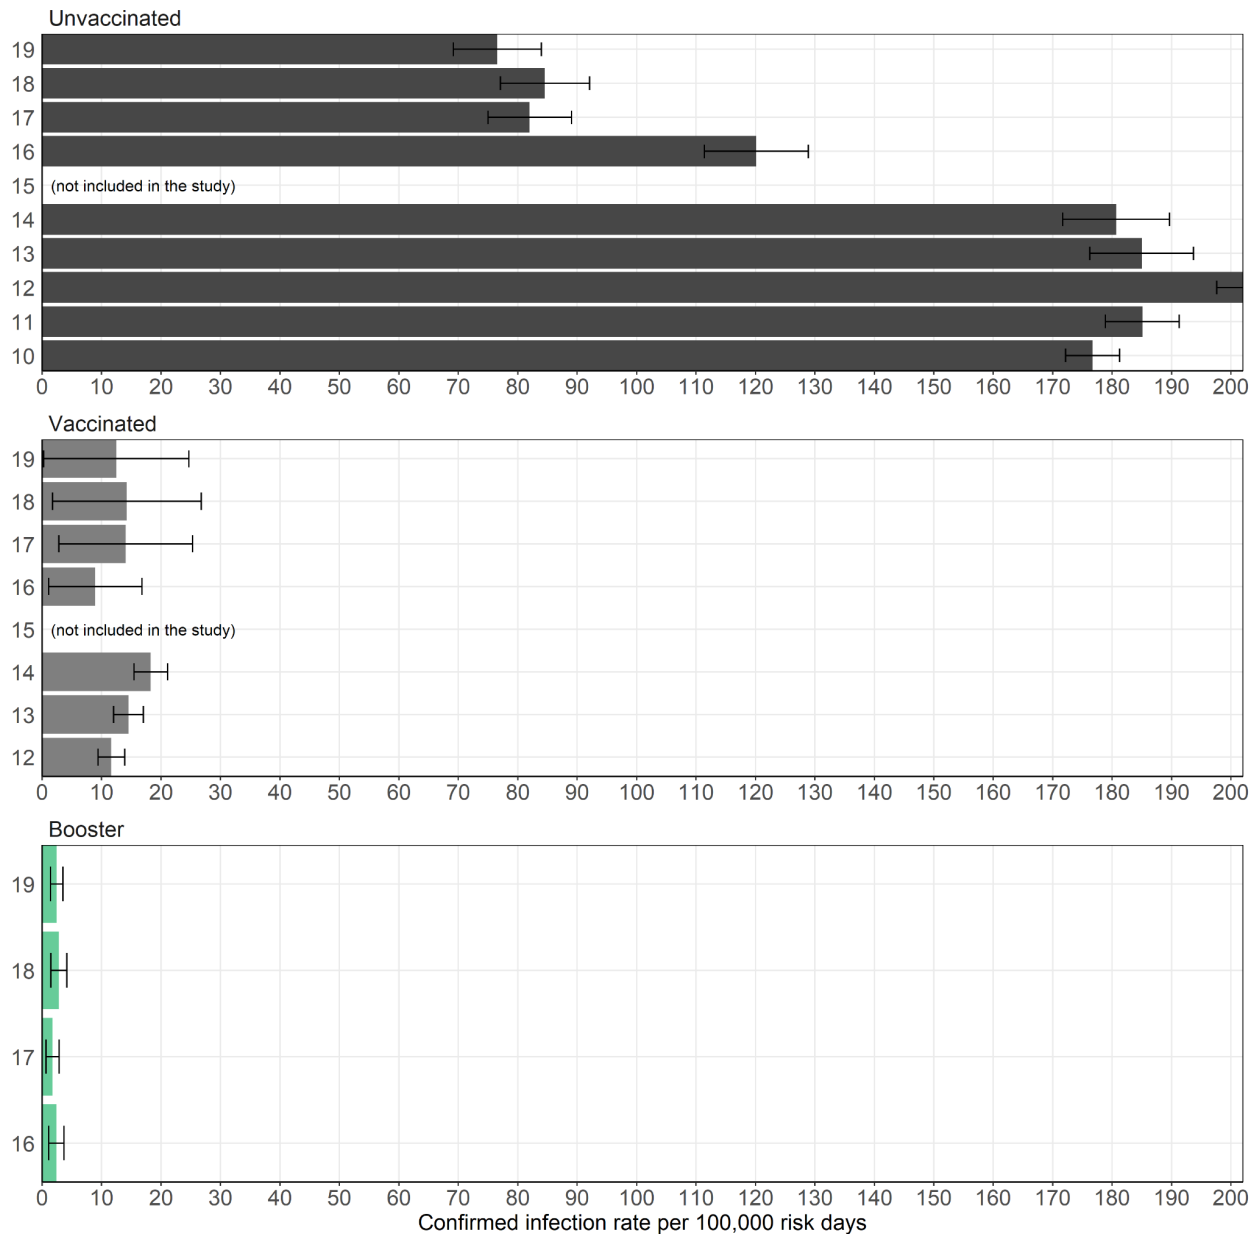

### Figure S3 - Protection compared to unvaccinated individuals

Estimated covariate-adjusted rates of confirmed infections per 100,000 at-risk days, based on  $n=9,150,521$  days at risk (A), and factor reductions in confirmed infections compared to unvaccinated individuals in the same age group (B). Obtained from a Poisson regression analysis for the study period September 12, 2021, to October 9, 2021, stratified by cohorts. Error bars show 95% confidence intervals (not adjusted for multiplicity).

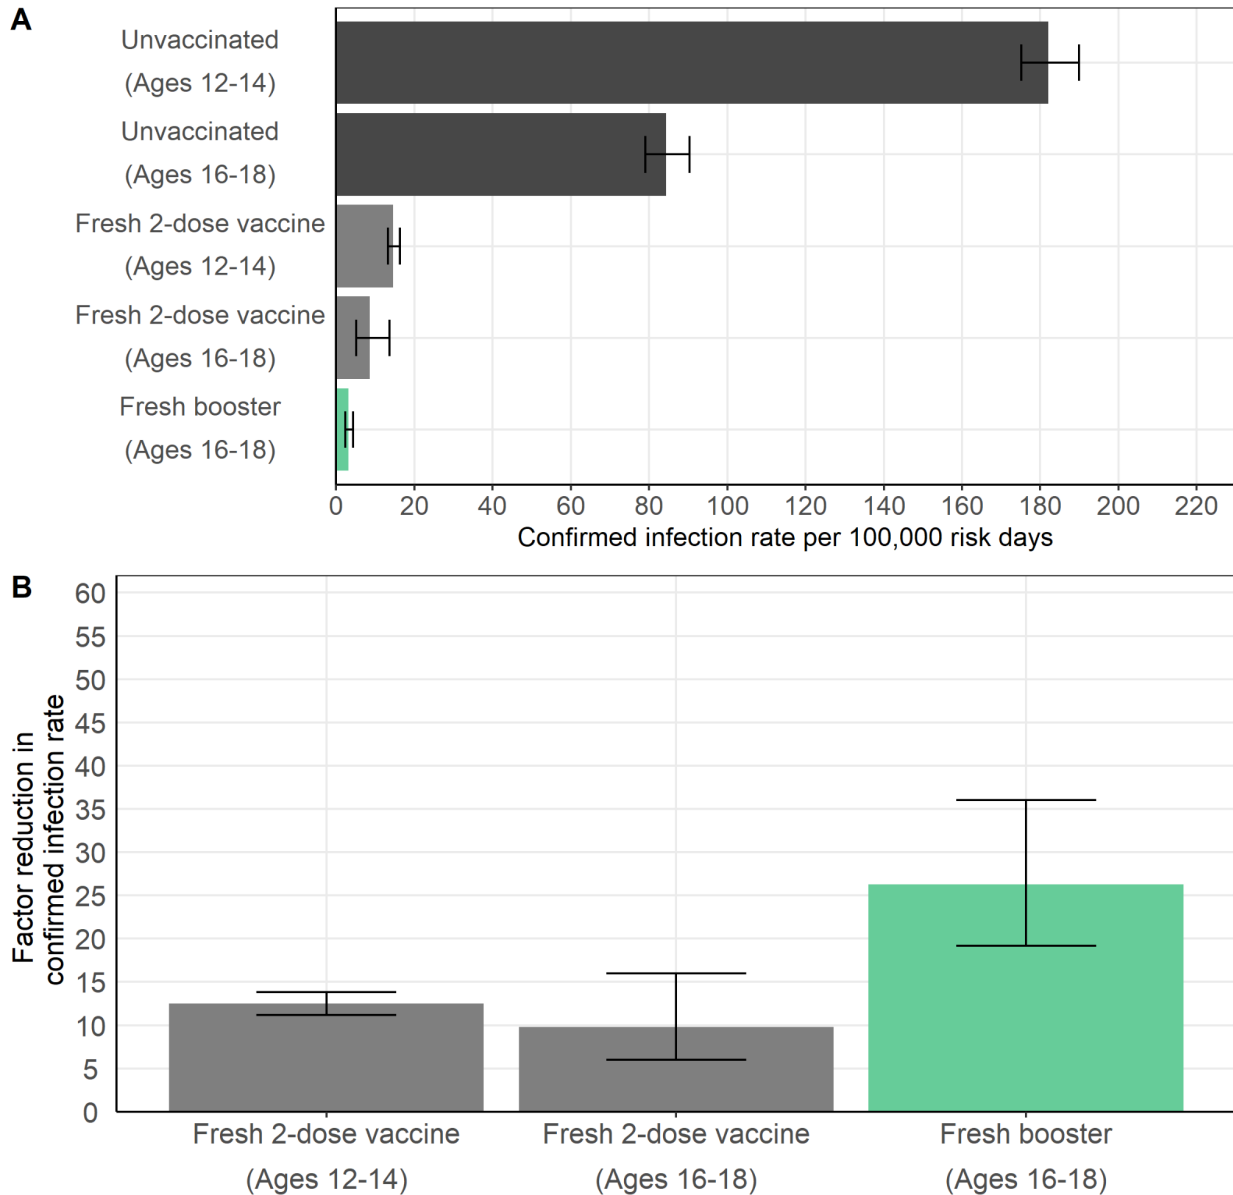

### Figure S4 - PCR testing rates in different age groups

PCR test rates per 100,000 risk days during September 2021, stratified by cohorts and ages, based on n=9,150,521 days at risk. The 15-year-old age group is not shown since it includes individuals who were eligible to vaccinate at different times. Error bars show 95% confidence intervals.

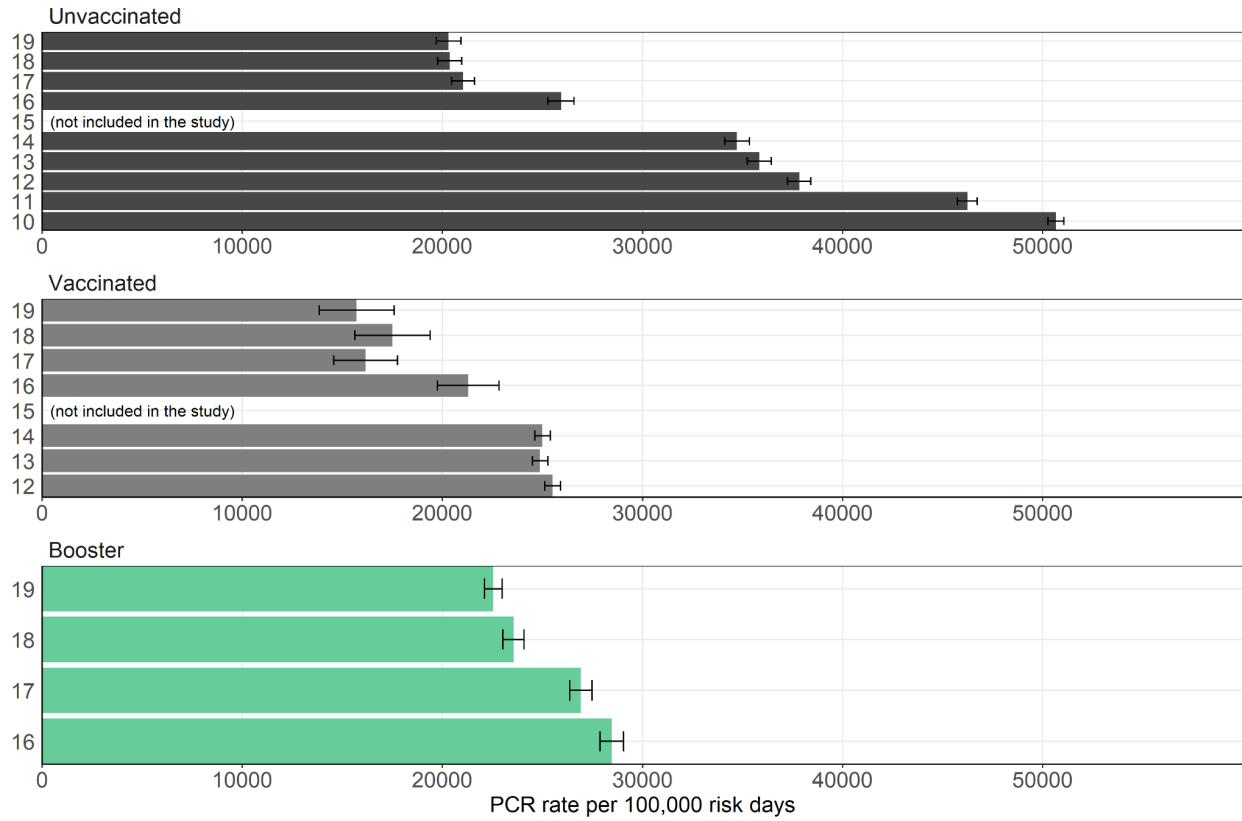

Supplement: 41467_2022_29578_MOESM1_ESM.pdf [file 41467_2022_29578_MOESM1_ESM.pdf]
